# Supplementary material for: A Proteomic Approach for the Diagnosis of Bacterial Meningitis
Source: PubMed Central journal article supplement (PMC2851643; doi:10.1371/journal.pone.0010079), 2010-04-08

**Spot I: Fibulin-1 (P23142)**  
PMF score = 82

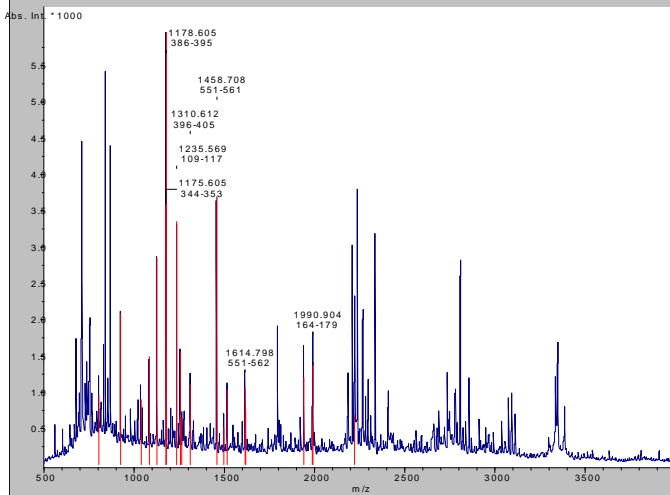

**CCHCCLLGR, MS/MS ion score = 29**

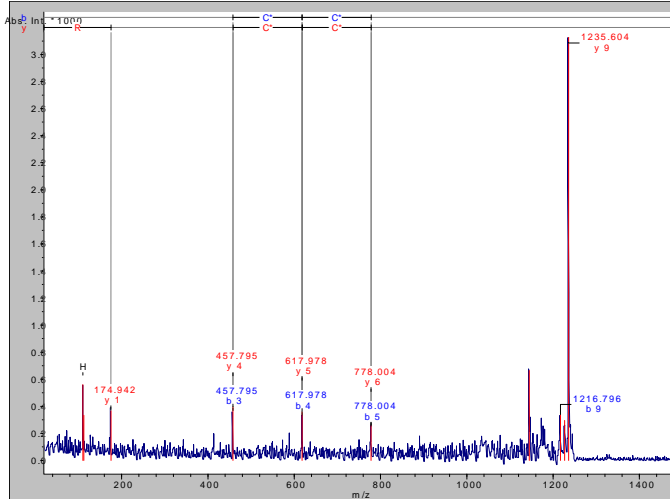

**TGYFDGISR, MS/MS ion score = 12**

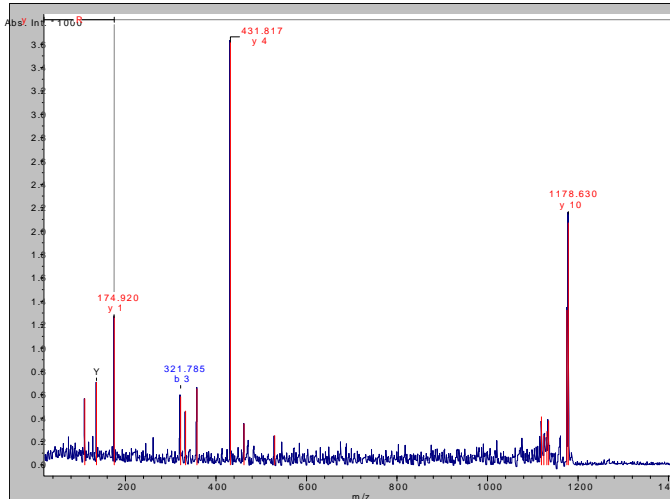

**Spot II: Glial fibrillary acidic protein (P14136)**  
**PMF score = 184**

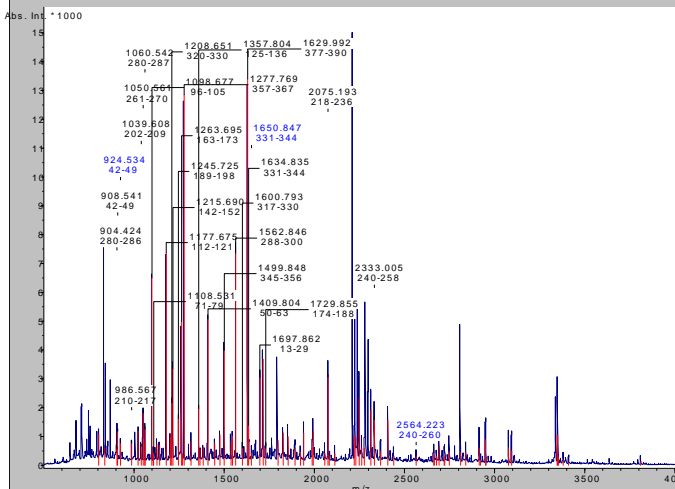

**LADVQAE LR, MS/MS ion score = 59**

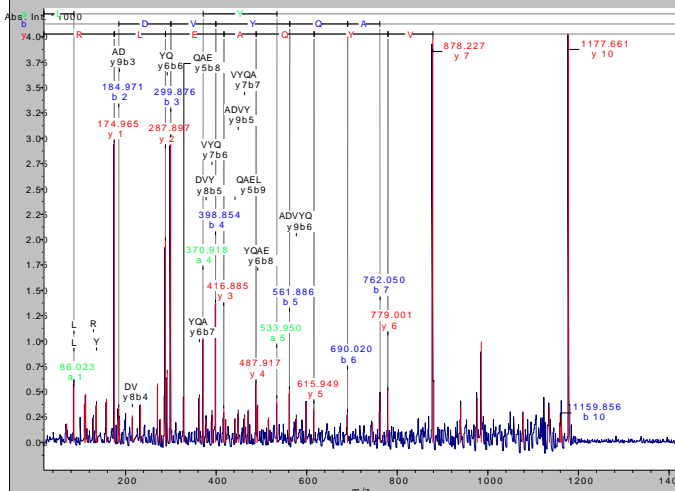

**QLQSLTCDLESLR, MS/MS ion score = 54**

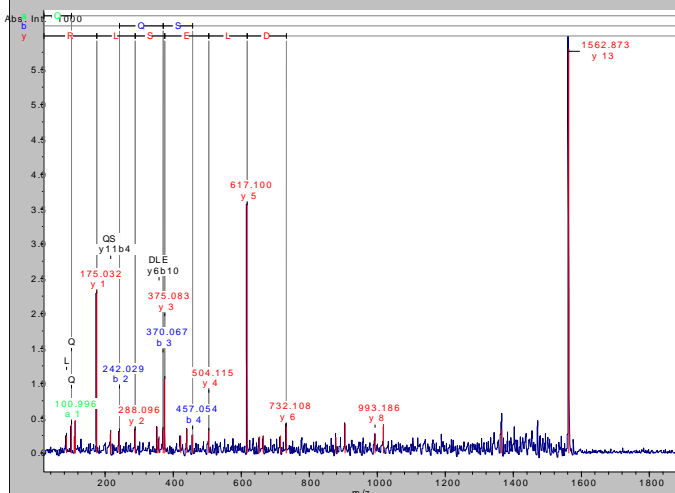

ITIPVQTFSNLQIR, MS/MS ion score = 48

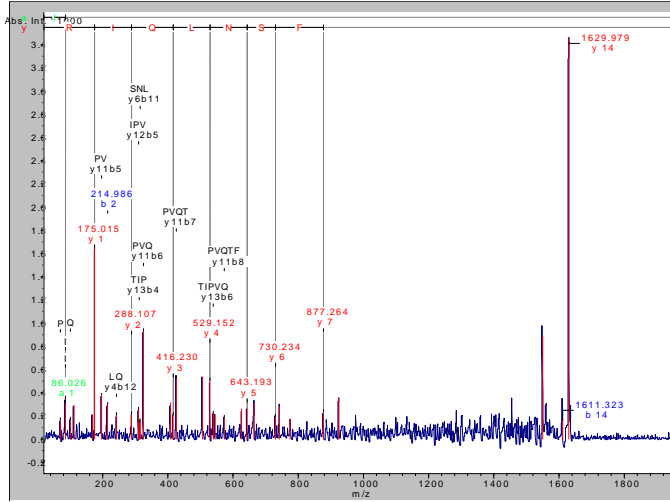

Spot III: Fibrinogen beta chain (P02675)  
PMF score = 170

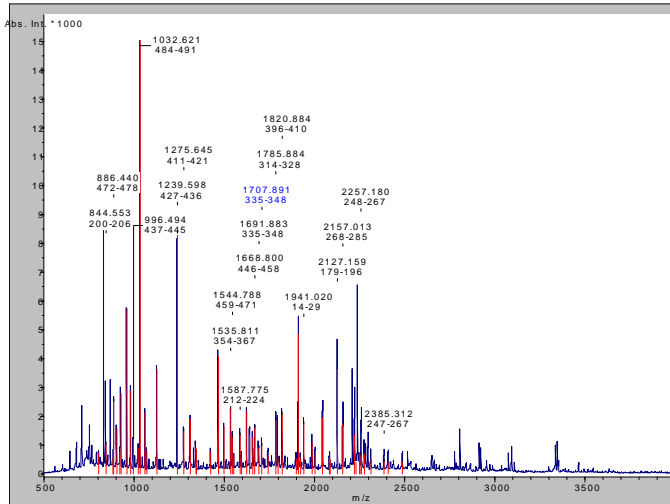

HQLYIDETVNSNIPTNLR, MS/MS ion score = 55

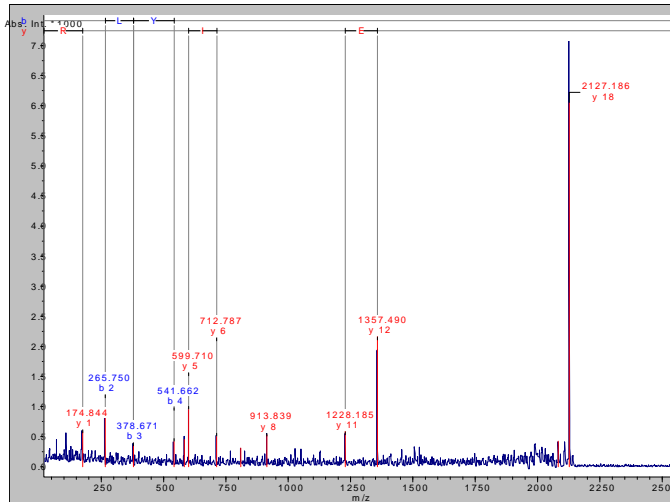

VYCDMNTENGGWTVIQNR, MS/MS ion score = 30

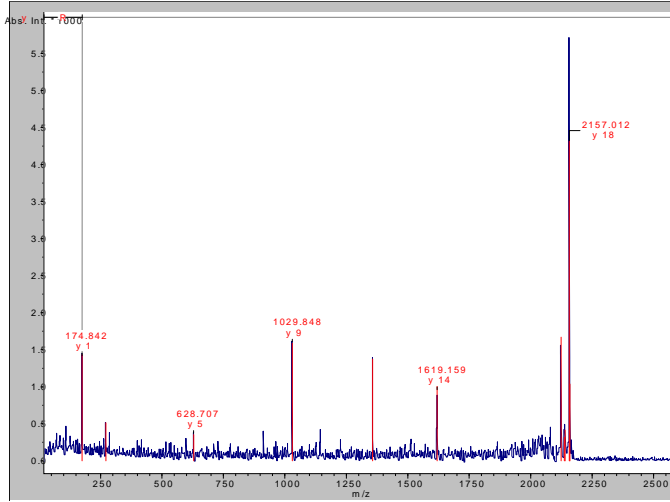

Spot IV: Haptoglobin (P00738)  
PMF score = 112

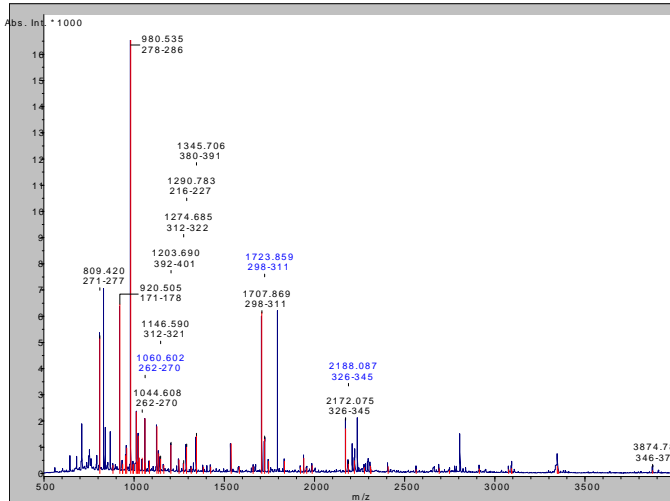

YVMLPVADQDQCIR, MS/MS ion score = 67

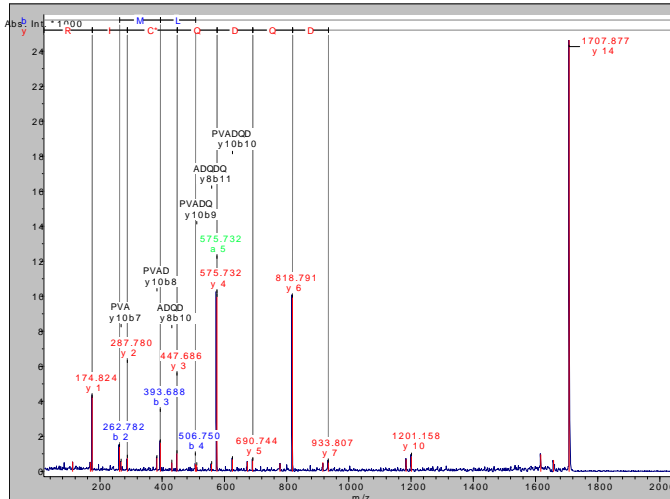

**GSFPWQAK, MS/MS ion score = 33**

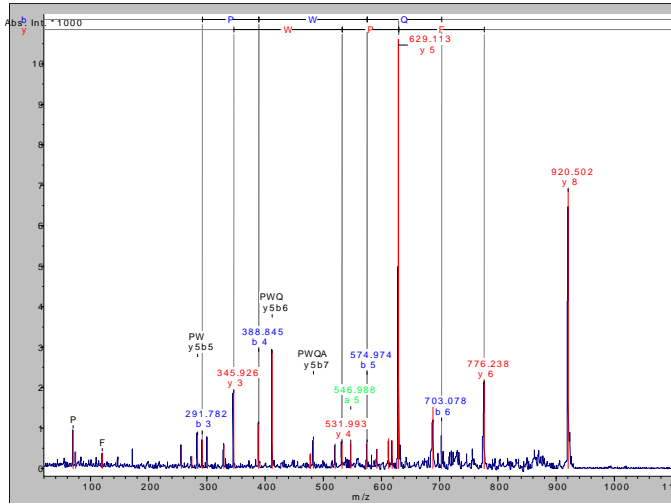

**VGYSVGWGR, MS/MS ion score = 26**

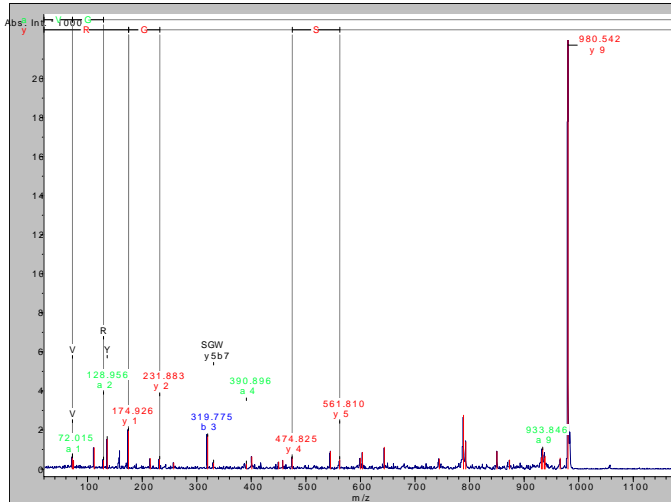

**Spot V: Apolipoprotein E (P02649)**

PMF score = 160

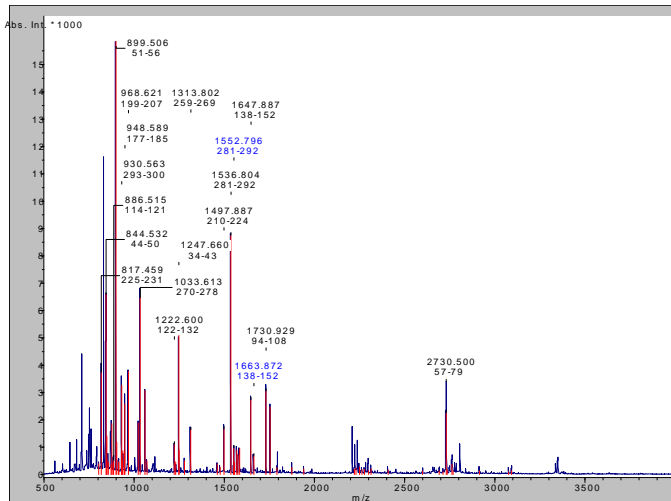

SWFEPLVEDMQR, MS/MS ion score = 53

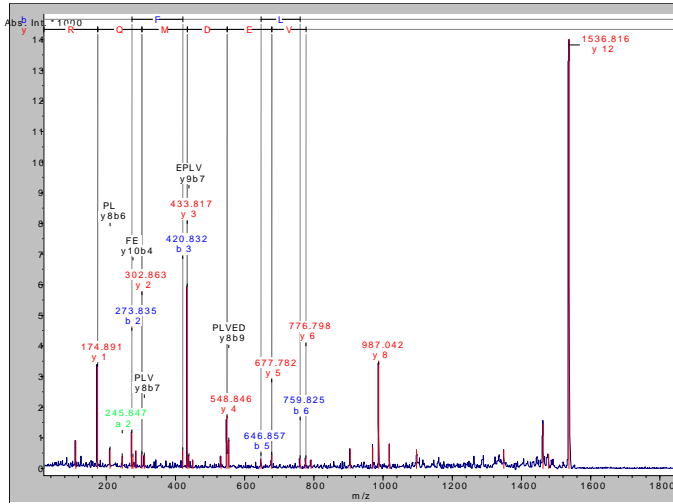

QQTEWQSGQR, MS/MS ion score = 28

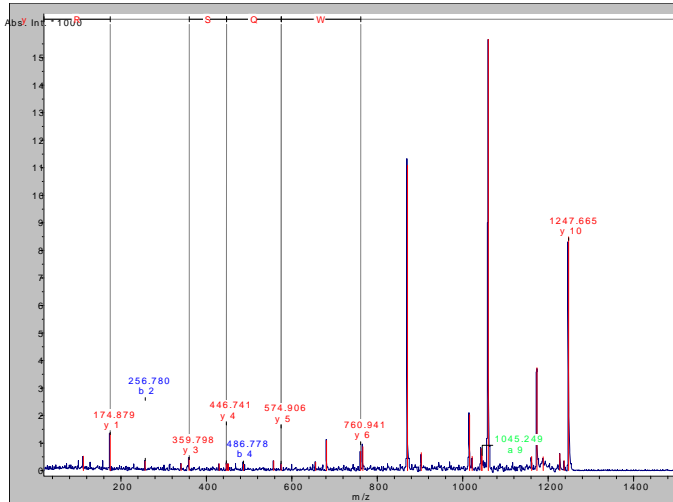

LQAEAFQAR, MS/MS ion score = 28

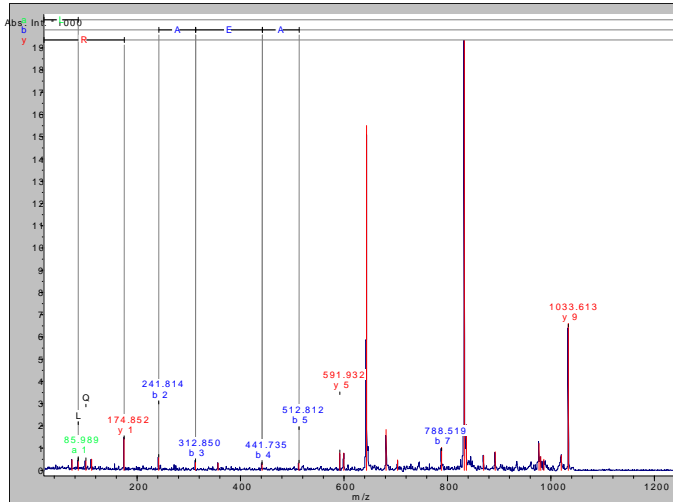

FWDYLR, MS/MS ion score = 14

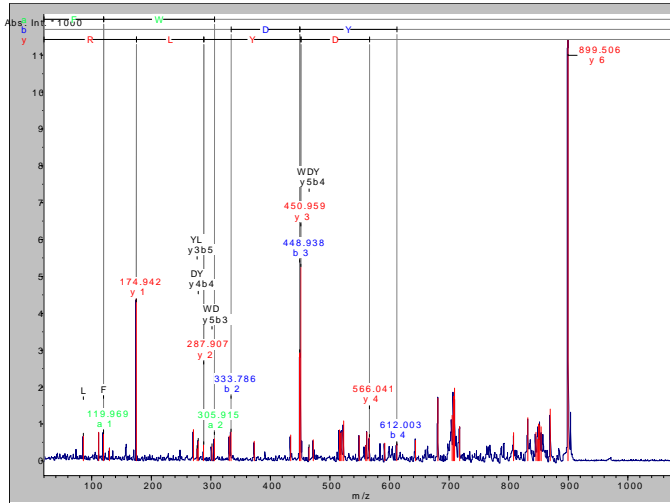

Spot VI: Prostaglandin-H2 D-isomerase (P41222)  
PMF score = 63

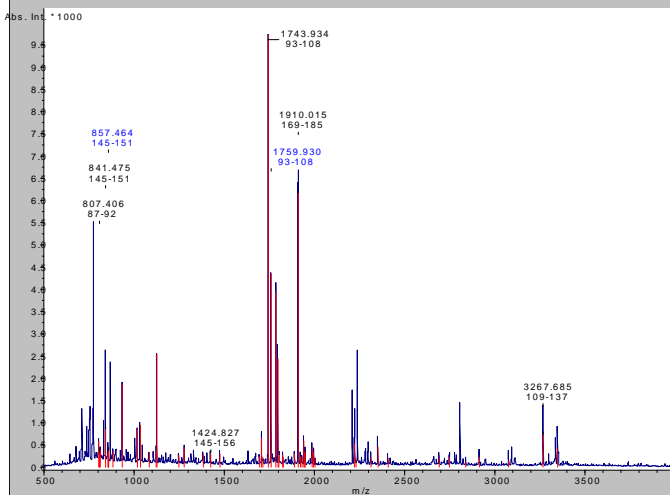

AQGFTEDTIVFLPQTDK, MS/MS ion score = 91

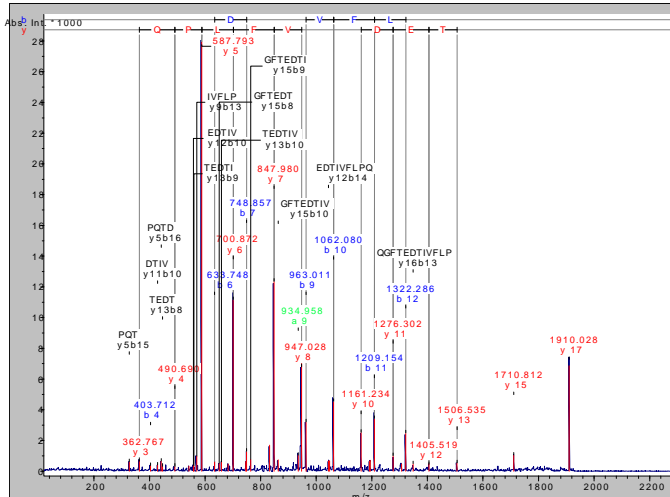

TMLLQPAGSLGYSYR, MS/MS ion score = 70

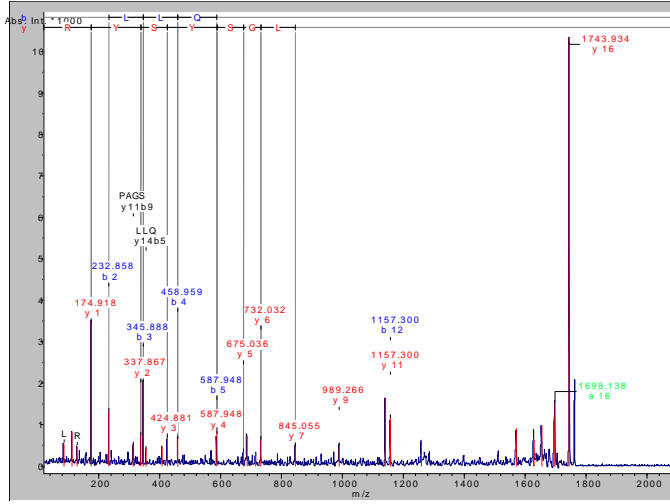

Supplement: pone.0010079.s003.pdf [file pone.0010079.s003.pdf]
